# Supplementary material
Source: PubMed Central journal article supplement (PMC7966240)
Supplement: 3978_materials.pdf [file 3978_materials.pdf]

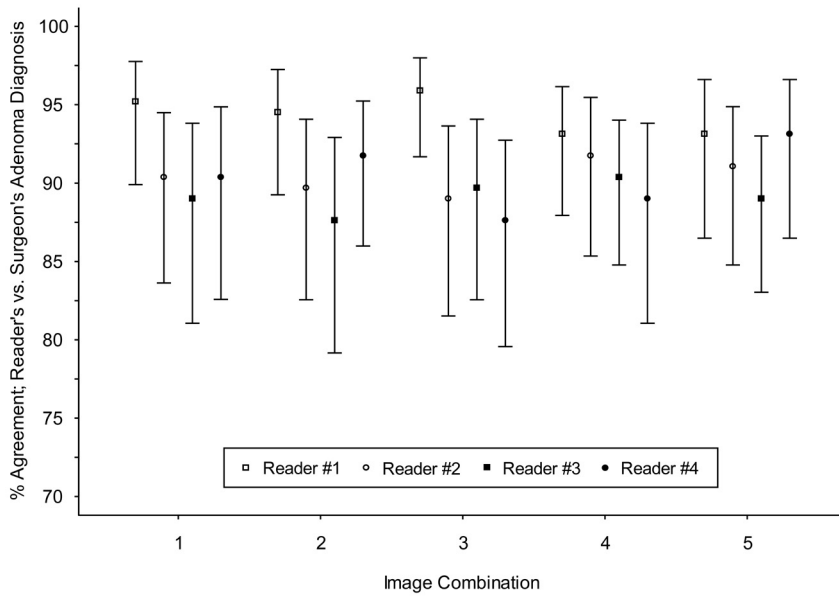

**ON-LINE FIG 1.** Individual agreement between the reader's interpretation of the combination of imaging sequences and the surgeon's pathologic findings based on localization to a specific quadrant.

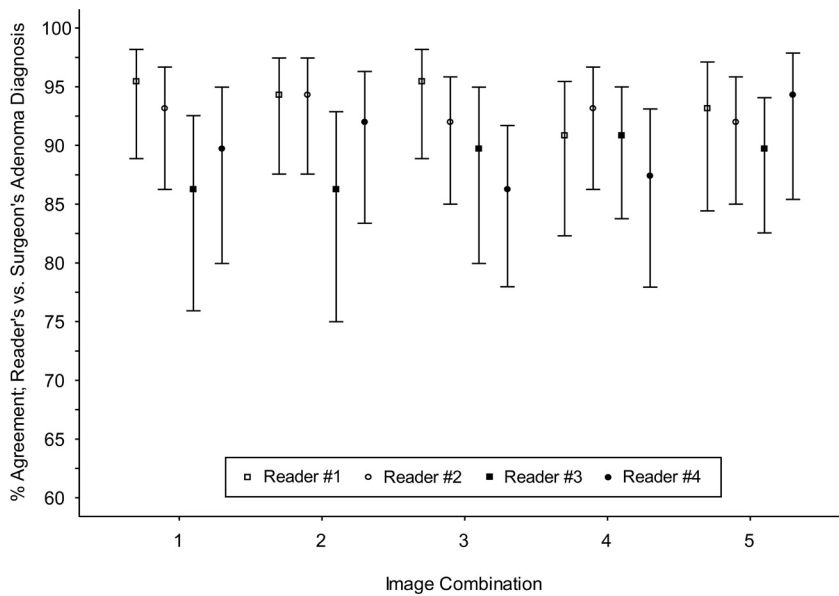

**ON-LINE FIG 2.** Individual agreement between the reader's interpretation of the combination of imaging sequences and the surgeon's pathologic findings based on lateralization to a side of the thyroid (left-versus-right).

**On-line Table 1: Estimates for reader-versus-surgeon adenoma diagnostic agreement (%) when the agreement criterion is based on an exact match between the right upper, right lower, left upper, left lower, and ectopic adenoma diagnoses (positive, negative) of the readers and the surgeons**

| Reader          | Image Combination |                   |                   |                   |                   | P Value <sup>a</sup> |
|-----------------|-------------------|-------------------|-------------------|-------------------|-------------------|----------------------|
|                 | 1                 | 2                 | 3                 | 4                 | 5                 |                      |
| Combined % (CL) | 92.2 (86.5, 94.4) | 90.9 (86.6, 93.9) | 90.5 (86.1, 93.6) | 91.0 (87.1, 93.9) | 91.6 (87.4, 94.4) | .996                 |
| 1               | 95.2 (89.9, 97.8) | 94.5 (89.3, 97.3) | 95.9 (91.7, 98.0) | 93.1 (87.9, 96.2) | 93.1 (86.5, 96.6) | .793                 |
| 2               | 90.3 (83.6, 94.5) | 89.7 (83.6, 94.1) | 89.0 (81.5, 93.6) | 91.7 (85.4, 95.5) | 91.0 (84.8, 94.9) | .959                 |
| 3               | 89.0 (81.1, 93.8) | 87.6 (79.2, 92.9) | 89.7 (82.6, 94.1) | 90.3 (84.8, 94.0) | 89.0 (83.0, 93.0) | .973                 |
| 4               | 90.3 (82.6, 94.9) | 91.7 (86.0, 95.2) | 87.6 (79.6, 92.7) | 89.0 (81.1, 93.8) | 93.1 (86.5, 96.6) | .677                 |

Note:—CL indicates confidence limit.

<sup>a</sup> Test for no association between imaging combination and reader-versus-surgeon diagnostic agreement.

**On-line Table 2: Summary for reader-versus-surgeon diagnostic agreement when the agreement criterion is based on an exact match between the right upper, right lower, left upper, left lower, and ectopic adenoma diagnoses (positive, negative) of the readers and the surgeons**

| Reader   | Image Combination |                    |                 |                    |                 |                    |                 |                    |                 |                    | P Value <sup>a</sup> |
|----------|-------------------|--------------------|-----------------|--------------------|-----------------|--------------------|-----------------|--------------------|-----------------|--------------------|----------------------|
|          | 1                 |                    | 2               |                    | 3               |                    | 4               |                    | 5               |                    |                      |
|          | Agree (No.) (%)   | Disagree (No.) (%) | Agree (No.) (%) | Disagree (No.) (%) | Agree (No.) (%) | Disagree (No.) (%) | Agree (No.) (%) | Disagree (No.) (%) | Agree (No.) (%) | Disagree (No.) (%) |                      |
| Combined | 529 (91.2)        | 51 (8.8)           | 527 (90.9)      | 53 (9.1)           | 525 (90.5)      | 55 (9.5)           | 528 (91.0)      | 52 (9.0)           | 531 (91.6)      | 49 (8.4)           | .996                 |
| 1        | 138 (95.2)        | 7 (4.8)            | 137 (94.5)      | 8 (5.5)            | 139 (95.9)      | 6 (4.1)            | 135 (93.1)      | 10 (6.9)           | 136 (93.1)      | 10 (6.9)           | .793                 |
| 2        | 131 (90.3)        | 14 (9.7)           | 130 (89.7)      | 15 (10.3)          | 129 (89.0)      | 16 (11.0)          | 133 (97.7)      | 12 (8.3)           | 132 (91.0)      | 13 (9.0)           | .959                 |
| 3        | 129 (89.0)        | 16 (11.0)          | 127 (87.6)      | 18 (12.4)          | 130 (89.7)      | 15 (10.3)          | 132 (90.3)      | 14 (9.7)           | 129 (89.0)      | 16 (11.0)          | .973                 |
| 4        | 131 (90.3)        | 14 (9.7)           | 133 (91.7)      | 12 (8.3)           | 127 (87.6)      | 18 (12.4)          | 129 (89.0)      | 16 (11.0)          | 135 (93.1)      | 10 (6.7)           | .677                 |

<sup>a</sup> Test for no association between imaging combination and reader-versus-surgeon diagnostic agreement.

**On-line Table 3: Overall summary for diagnostic agreement between the readers and surgeons when the agreement criterion is based on an exact match between the right upper, right lower, left upper, left lower, and ectopic adenoma diagnoses (positive, negative) of the readers and the surgeons and the surgeons' diagnoses are considered the criterion standard**

| Agreement Measure  | Image Combination |                   |                   |                   |                   |
|--------------------|-------------------|-------------------|-------------------|-------------------|-------------------|
|                    | 1                 | 2                 | 3                 | 4                 | 5                 |
| Combined           |                   |                   |                   |                   |                   |
| Sensitivity % (CL) | 82.1 (74.8, 88.1) | 82.9 (75.6, 88.7) | 82.1 (74.8, 88.1) | 83.6 (76.4, 89.3) | 84.3 (77.2, 89.9) |
| Specificity        | 94.1 (91.5, 96.1) | 93.4 (90.7, 95.5) | 93.2 (90.4, 95.4) | 93.4 (90.7, 95.5) | 93.9 (91.2, 95.9) |
| PPV                | 81.6 (74.2, 87.6) | 80.0 (72.6, 86.2) | 79.3 (71.8, 85.6) | 80.1 (72.7, 86.3) | 81.4 (74.1, 87.4) |
| NPV                | 94.3 (91.7, 96.3) | 94.5 (91.9, 96.4) | 94.3 (91.6, 96.2) | 94.7 (92.2, 96.6) | 94.9 (92.4, 96.8) |
| Reader 1           |                   |                   |                   |                   |                   |
| Sensitivity % (CL) | 88.6 (73.3, 96.8) | 88.6 (73.3, 96.8) | 91.4 (76.9, 98.2) | 82.9 (66.6, 93.4) | 82.9 (66.4, 93.4) |
| Specificity        | 97.3 (92.2, 99.4) | 96.4 (91.0, 99.0) | 97.3 (92.2, 99.4) | 96.4 (91.0, 99.0) | 96.4 (91.0, 99.0) |
| PPV                | 91.2 (76.3, 98.1) | 88.6 (73.3, 96.8) | 91.4 (76.9, 98.2) | 87.9 (71.8, 96.6) | 87.9 (71.8, 96.6) |
| NPV                | 96.4 (91.0, 99.0) | 96.4 (91.0, 99.0) | 97.3 (92.2, 99.4) | 94.6 (88.7, 98.0) | 94.6 (88.7, 98.0) |
| Reader 2           |                   |                   |                   |                   |                   |
| Sensitivity % (CL) | 80.0 (63.1, 91.6) | 77.1 (59.9, 89.6) | 74.3 (56.7, 87.5) | 85.7 (69.7, 95.2) | 85.7 (69.7, 95.2) |
| Specificity        | 93.6 (87.3, 97.4) | 93.6 (87.3, 97.4) | 93.6 (87.3, 97.4) | 93.6 (87.3, 97.4) | 92.7 (86.2, 96.8) |
| PPV                | 80.0 (63.1, 91.6) | 79.4 (62.1, 91.3) | 78.8 (61.1, 91.0) | 81.1 (64.8, 92.0) | 78.9 (62.7, 90.4) |
| NPV                | 93.6 (87.3, 97.4) | 92.8 (86.3, 96.8) | 92.0 (85.3, 96.3) | 95.4 (89.5, 98.5) | 95.3 (89.4, 98.5) |
| Reader 3           |                   |                   |                   |                   |                   |
| Sensitivity % (CL) | 80.8 (63.1, 91.6) | 80.0 (63.1, 91.6) | 80.0 (63.1, 91.6) | 82.0 (66.4, 93.4) | 77.1 (59.9, 89.6) |
| Specificity        | 91.8 (85.0, 96.2) | 90.0 (82.8, 94.9) | 92.7 (86.2, 96.8) | 92.7 (86.2, 96.8) | 92.7 (86.2, 96.8) |
| PPV                | 75.7 (58.8, 88.2) | 71.8 (55.1, 85.0) | 71.8 (55.1, 85.0) | 78.4 (61.8, 90.2) | 77.1 (59.9, 89.6) |
| NPV                | 93.5 (87.1, 97.4) | 93.4 (86.9, 97.3) | 93.4 (86.9, 97.3) | 94.4 (88.3, 97.9) | 92.7 (86.2, 96.8) |
| Reader 4           |                   |                   |                   |                   |                   |
| Sensitivity % (CL) | 80.0 (63.1, 91.6) | 85.7 (69.7, 95.2) | 82.9 (66.4, 93.4) | 82.9 (66.4, 93.4) | 91.4 (76.9, 98.2) |
| Specificity        | 93.6 (87.3, 97.4) | 93.6 (87.3, 97.4) | 89.1 (81.7, 94.2) | 90.9 (83.9, 95.6) | 93.6 (87.3, 97.4) |
| PPV                | 80.0 (63.1, 91.6) | 81.1 (64.8, 92.0) | 70.7 (54.5, 83.9) | 74.4 (57.9, 87.0) | 82.1 (66.5, 92.5) |
| NPV                | 93.6 (87.3, 97.4) | 95.4 (89.5, 98.5) | 94.2 (87.9, 97.9) | 94.3 (88.1, 97.9) | 97.2 (92.0, 99.4) |

Note:—CL indicates confidence limit.

**On-line Table 4: ROC summary for diagnostic agreement between the readers and surgeons when the agreement criterion is based on an exact match between the right upper, right lower, left upper, left lower, and ectopic adenoma diagnoses (positive, negative) of the readers and the surgeons and the surgeons' diagnoses are considered the criterion standard**

| Reader   | Agreement Measure | Image Combination |                   |                   |                   |                   |
|----------|-------------------|-------------------|-------------------|-------------------|-------------------|-------------------|
|          |                   | 1                 | 2                 | 3                 | 4                 | 5                 |
| Combined | ROC (CL)          | 0.88 (0.86, 0.90) | 0.88 (0.86, 0.90) | 0.88 (0.86, 0.90) | 0.88 (0.86, 0.90) | 0.89 (0.87, 0.91) |
| Reader 1 | ROC (CL)          | 0.93 (0.90, 0.96) | 0.92 (0.89, 0.96) | 0.94 (0.91, 0.97) | 0.90 (0.86, 0.93) | 0.90 (0.86, 0.93) |
| Reader 2 | ROC (CL)          | 0.87 (0.83, 0.91) | 0.85 (0.81, 0.90) | 0.84 (0.79, 0.89) | 0.90 (0.86, 0.93) | 0.89 (0.85, 0.93) |
| Reader 3 | ROC (CL)          | 0.86 (0.82, 0.90) | 0.85 (0.80, 0.89) | 0.86 (0.82, 0.91) | 0.88 (0.84, 0.92) | 0.85 (0.80, 0.89) |
| Reader 4 | ROC (CL)          | 0.87 (0.83, 0.91) | 0.89 (0.86, 0.93) | 0.86 (0.82, 0.90) | 0.87 (0.83, 0.91) | 0.93 (0.89, 0.96) |

Note:—ROC indicates receiver operating characteristic analysis; CL, confidence limit.

**On-line Table 5: Estimates for reader-versus-surgeon adenoma diagnostic agreement (%) when the diagnostic agreement criterion is based on matches between the right, left, and ectopic adenoma diagnoses (positive, negative) of the readers and the surgeons**

| Reader          | Image Combination |                   |                   |                   |                   | P Value <sup>a</sup> |
|-----------------|-------------------|-------------------|-------------------|-------------------|-------------------|----------------------|
|                 | 1                 | 2                 | 3                 | 4                 | 5                 |                      |
| Combined % (CL) | 91.1 (85.8, 94.6) | 91.7 (87.1, 94.7) | 90.8 (86.5, 93.8) | 90.5 (85.4, 94.0) | 92.2 (87.5, 95.3) | .976                 |
| 1               | 95.4 (88.9, 98.2) | 94.3 (87.6, 97.5) | 95.4 (88.9, 98.2) | 90.8 (82.3, 95.5) | 93.1 (84.4, 97.1) | .705                 |
| 2               | 93.1 (86.3, 97.5) | 92.0 (95.0, 95.8) | 93.1 (86.3, 96.7) | 93.1 (86.3, 96.7) | 92.0 (85.0, 95.8) | .967                 |
| 3               | 86.2 (75.9, 92.5) | 86.2 (75.0, 92.9) | 89.7 (80.0, 95.0) | 90.8 (83.8, 95.0) | 89.7 (82.6, 94.1) | .837                 |
| 4               | 89.7 (80.0, 95.0) | 92.0 (83.4, 96.3) | 86.2 (78.0, 91.7) | 87.4 (77.9, 93.1) | 94.3 (85.4, 97.9) | .477                 |

Note:—CL indicates confidence limit.

<sup>a</sup> Test for no association between imaging combination and reader-versus-surgeon diagnostic agreement.

**On-line Table 6: Summary for reader-versus-surgeon diagnostic agreement when the diagnostic agreement criterion is based on matches between the right, left, and ectopic adenoma diagnoses (positive, negative) of the readers and the surgeons**

| Reader   | Image Combination |                    |                 |                    |                 |                    |                 |                    |                 |                    | P Value <sup>a</sup> |
|----------|-------------------|--------------------|-----------------|--------------------|-----------------|--------------------|-----------------|--------------------|-----------------|--------------------|----------------------|
|          | 1                 |                    | 2               |                    | 3               |                    | 4               |                    | 5               |                    |                      |
|          | Agree (No.) (%)   | Disagree (No.) (%) | Agree (No.) (%) | Disagree (No.) (%) | Agree (No.) (%) | Disagree (No.) (%) | Agree (No.) (%) | Disagree (No.) (%) | Agree (No.) (%) | Disagree (No.) (%) |                      |
| Combined | 317 (91.1)        | 31 (8.9)           | 319 (91.7)      | 29 (8.3)           | 316 (90.8)      | 32 (9.2)           | 315 (90.5)      | 33 (9.5)           | 321 (92.2)      | 27 (7.8)           | .976                 |
| 1        | 83 (95.4)         | 4 (4.6)            | 82 (94.3)       | 8 (5.5)            | 83 (95.4)       | 4 (4.6)            | 79 (90.8)       | 8 (9.2)            | 81 (93.1)       | 6 (6.9)            | .705                 |
| 2        | 81 (93.1)         | 6 (6.9)            | 82 (94.3)       | 5 (5.8)            | 80 (92.0)       | 7 (8.0)            | 81 (93.1)       | 6 (6.9)            | 80 (92.0)       | 7 (8.0)            | .967                 |
| 3        | 75 (86.2)         | 12 (13.8)          | 75 (86.2)       | 12 (13.8)          | 78 (89.7)       | 9 (10.3)           | 79 (90.8)       | 8 (9.2)            | 78 (89.7)       | 16 (10.3)          | .837                 |
| 4        | 78 (89.7)         | 9 (10.3)           | 80 (92.0)       | 7 (8.0)            | 75 (86.2)       | 12 (13.8)          | 76 (87.4)       | 11 (12.6)          | 82 (94.3)       | 5 (5.7)            | .477                 |

<sup>a</sup> Test for no association between imaging combination and reader-versus-surgeon diagnostic agreement.

**On-line Table 7: Overall summary for diagnostic agreement between the readers' and surgeons' diagnoses when the diagnostic agreement criterion is based on exact matches between the right, left, and ectopic adenoma diagnoses (positive, negative) of the readers and the surgeons and the surgeons' diagnoses are considered the criterion standard**

| Agreement Measure  | Image Combination |                   |                   |                   |                   |
|--------------------|-------------------|-------------------|-------------------|-------------------|-------------------|
|                    | 1                 | 2                 | 3                 | 4                 | 5                 |
| Combined           |                   |                   |                   |                   |                   |
| Sensitivity % (CL) | 89.5 (82.7, 94.3) | 91.9 (85.7, 96.1) | 90.3 (83.7, 94.9) | 88.7 (81.8, 93.7) | 92.7 (86.7, 96.6) |
| Specificity        | 92.0 (87.6, 95.2) | 91.5 (87.1, 94.8) | 91.1 (86.5, 94.5) | 91.5 (87.1, 94.8) | 92.0 (87.6, 95.2) |
| PPV                | 86.0 (78.8, 91.5) | 85.7 (78.6, 91.2) | 84.8 (77.6, 90.5) | 85.3 (78.0, 90.8) | 86.5 (79.5, 91.8) |
| NPV                | 94.1 (90.1, 96.8) | 95.3 (91.6, 97.7) | 94.4 (90.5, 97.1) | 93.6 (89.5, 96.5) | 95.8 (92.2, 98.1) |
| Reader 1           |                   |                   |                   |                   |                   |
| Sensitivity % (CL) | 93.5 (78.6, 99.2) | 93.5 (78.6, 99.2) | 93.5 (78.6, 99.2) | 83.9 (66.3, 94.5) | 90.3 (74.2, 98.0) |
| Specificity        | 96.3 (87.7, 99.6) | 94.6 (85.1, 98.9) | 96.4 (87.7, 99.6) | 94.6 (85.1, 98.9) | 94.6 (85.1, 98.9) |
| PPV                | 93.5 (78.6, 99.2) | 90.6 (75.0, 98.0) | 93.5 (78.6, 99.2) | 89.7 (72.6, 97.8) | 90.3 (74.2, 98.0) |
| NPV                | 96.4 (87.7, 99.6) | 96.4 (87.5, 99.6) | 96.4 (87.7, 99.6) | 91.4 (81.0, 97.1) | 94.6 (85.1, 98.9) |
| Reader 2           |                   |                   |                   |                   |                   |
| Sensitivity % (CL) | 90.3 (74.2, 98.0) | 90.3 (74.2, 98.0) | 87.1 (70.2, 96.4) | 93.5 (78.6, 99.2) | 93.5 (78.6, 99.2) |
| Specificity        | 94.6 (85.1, 98.9) | 96.4 (87.7, 99.6) | 94.6 (85.1, 98.9) | 92.9 (82.7, 98.0) | 91.1 (80.4, 97.0) |
| PPV                | 90.3 (74.2, 98.0) | 93.3 (77.9, 99.2) | 90.0 (73.5, 97.9) | 87.9 (71.8, 96.6) | 85.3 (68.9, 95.0) |
| NPV                | 94.6 (85.1, 98.9) | 94.7 (85.4, 98.9) | 93.0 (83.0, 98.1) | 96.3 (87.3, 99.5) | 96.2 (87.0, 99.5) |
| Reader 3           |                   |                   |                   |                   |                   |
| Sensitivity % (CL) | 87.1 (70.2, 96.4) | 90.3 (74.2, 98.0) | 90.3 (74.2, 98.0) | 90.3 (74.2, 98.0) | 87.1 (70.2, 96.4) |
| Specificity        | 85.7 (73.8, 93.6) | 83.9 (71.7, 92.4) | 89.3 (78.1, 96.0) | 91.1 (80.4, 97.0) | 91.1 (80.4, 97.0) |
| PPV                | 77.1 (59.9, 89.6) | 75.7 (58.8, 88.2) | 82.4 (65.5, 93.2) | 84.8 (68.1, 94.9) | 84.4 (67.2, 94.7) |
| NPV                | 92.3 (81.5, 97.9) | 94.0 (83.5, 98.7) | 94.3 (84.3, 98.8) | 94.4 (84.6, 98.8) | 92.7 (82.4, 98.0) |
| Reader 4           |                   |                   |                   |                   |                   |
| Sensitivity % (CL) | 87.1 (70.2, 96.4) | 93.5 (78.6, 99.2) | 90.3 (74.2, 98.0) | 87.1 (70.2, 96.4) | 100 (88.8, 100)   |
| Specificity        | 91.1 (80.4, 97.0) | 91.1 (80.4, 97.0) | 83.9 (71.7, 92.4) | 87.5 (75.9, 94.8) | 91.1 (80.4, 97.0) |
| PPV                | 84.4 (67.2, 94.7) | 85.3 (68.9, 95.0) | 75.7 (58.8, 88.2) | 79.4 (62.1, 91.3) | 86.1 (70.5, 95.3) |
| NPV                | 92.7 (82.4, 98.0) | 96.2 (87.0, 99.5) | 94.0 (83.5, 98.7) | 92.5 (81.8, 97.9) | 100 (93.0, 100)   |

Note:—CL indicates confidence limit.

**On-line Table 8: ROC analysis summary for diagnostic agreement between the readers and surgeons when the agreement criterion is based on an exact match between the right upper, right lower, left upper, left lower, and ectopic adenoma diagnoses (positive, negative) of the readers and the surgeons and the surgeons' diagnoses are considered the criterion standard**

| Reader   | Agreement Measure | Image Combination |                   |                   |                   |                   |
|----------|-------------------|-------------------|-------------------|-------------------|-------------------|-------------------|
|          |                   | 1                 | 2                 | 3                 | 4                 | 5                 |
| Combined | ROC (CL)          | 0.91 (0.88, 0.93) | 0.92 (0.90, 0.94) | 0.91 (0.88, 0.93) | 0.90 (0.88, 0.92) | 0.92 (0.90, 0.94) |
| Reader 1 | ROC (CL)          | 0.95 (0.90, 0.98) | 0.95 (0.92, 0.98) | 0.95 (0.92, 0.98) | 0.89 (0.84, 0.94) | 0.92 (0.88, 0.97) |
| Reader 2 | ROC (CL)          | 0.93 (0.88, 0.97) | 0.91 (0.86, 0.95) | 0.91 (0.86, 0.95) | 0.93 (0.89, 0.97) | 0.92 (0.88, 0.96) |
| Reader 3 | ROC (CL)          | 0.86 (0.81, 0.92) | 0.87 (0.82, 0.92) | 0.90 (0.85, 0.95) | 0.91 (0.86, 0.95) | 0.89 (0.84, 0.89) |
| Reader 4 | ROC (CL)          | 0.89 (0.84, 0.94) | 0.92 (0.88, 0.96) | 0.87 (0.82, 0.93) | 0.87 (0.82, 0.93) | 0.96 (0.92, 0.99) |

Note:—ROC indicates receiver operating characteristic analysis; CL, confidence limit.
